# Supplementary material for: Better transplant outcome with pre-transplant marrow response after hypomethylating treatment in higher-risk MDS with excess blasts
Source: PubMed Central journal article supplement (PMC5355349; doi:10.18632/oncotarget.12511), 2016-10-06
Supplement: oncotarget-08-12342-s001.pdf [file oncotarget-08-12342-s001.pdf]

## Better transplant outcome with pre-transplant marrow response after hypomethylating treatment in higher-risk MDS with excess blasts

### Supplementary Material

**Supplementary Table 1**  
**Prognostic factors of marrow response achievement and HMT-related mortality**

|                                 | Achievement of marrow response |      |      |                       |      | HMT-related mortality |      |      |                       |      |
|---------------------------------|--------------------------------|------|------|-----------------------|------|-----------------------|------|------|-----------------------|------|
|                                 | Univariate analysis            |      |      | Multivariate analysis |      | Univariate analysis   |      |      | Multivariate analysis |      |
|                                 | E/N                            | %    | P    | OR (95% CI)           | P    | E/N                   | %    | P    | OR (95% CI)           | P    |
| Age                             |                                |      |      |                       |      |                       |      |      |                       |      |
| <53                             | 29/49                          | 59.2 |      |                       |      | 2/49                  | 4.1  |      |                       |      |
| >53                             | 21/49                          | 42.9 | 0.16 |                       |      | 6/49                  | 12.2 | 0.27 |                       |      |
| Sex                             |                                |      |      |                       |      |                       |      |      |                       |      |
| Male                            | 26/61                          | 42.6 |      | 1                     |      | 4/37                  | 10.8 |      |                       |      |
| Female                          | 24/37                          | 64.9 | 0.04 | 0.53 (0.22–1.29)      | 0.17 | 4/61                  | 6.6  | 0.47 |                       |      |
| Drug                            |                                |      |      |                       |      |                       |      |      |                       |      |
| Decitabine                      | 19/32                          | 59.4 |      |                       |      | 3/32                  | 9.4  |      |                       |      |
| Azacitidine                     | 31/66                          | 47.0 | 0.18 |                       |      | 5/66                  | 7.6  | 0.71 |                       |      |
| MDS type                        |                                |      |      |                       |      |                       |      |      |                       |      |
| De novo                         | 48/90                          | 53.3 |      |                       |      | 7/90                  | 7.8  |      |                       |      |
| Secondary                       | 2/8                            | 25.0 | 0.12 |                       |      | 1/8                   | 12.5 | 0.51 |                       |      |
| WHO diagnosis                   |                                |      |      |                       |      |                       |      |      |                       |      |
| RAEB-1                          | 14/20                          | 70.0 |      |                       |      | 3/20                  | 15.0 |      |                       |      |
| RAEB-2                          | 33/73                          | 45.2 |      |                       |      | 5/73                  | 6.8  |      |                       |      |
| CMMoL-1/2                       | 3/5                            | 60.0 | 0.12 |                       |      | 0/5                   | 0    | 0.59 |                       |      |
| IPSS                            |                                |      |      |                       |      |                       |      |      |                       |      |
| Intermediate-2                  | 37/70                          | 52.9 |      |                       |      | 5/70                  | 7.1  |      |                       |      |
| High                            | 13/28                          | 46.4 | 0.36 |                       |      | 3/28                  | 10.7 | 0.69 |                       |      |
| Cytogenetic risk                |                                |      |      |                       |      |                       |      |      |                       |      |
| Good/Intermediate               | 41/75                          | 54.7 |      |                       |      | 3/75                  | 4.0  |      | 1                     |      |
| Poor                            | 9/23                           | 39.1 | 0.24 |                       |      | 5/23                  | 21.7 | 0.02 | 4.12 (0.78–21.78)     | 0.10 |
| Normal karyotype                |                                |      |      |                       |      |                       |      |      |                       |      |
| Yes                             | 18/38                          | 44.7 |      |                       |      | 2/38                  | 5.3  |      |                       |      |
| No                              | 33/60                          | 55.0 | 0.41 |                       |      | 6/60                  | 10.0 | 0.49 |                       |      |
| WBC ( x10 <sup>6</sup> /L)      |                                |      |      |                       |      |                       |      |      |                       |      |
| < 3000                          | 30/54                          | 55.6 |      |                       |      | 2/54                  | 3.7  |      |                       |      |
| ≥ 3000/                         | 20/44                          | 45.5 | 0.42 |                       |      | 6/44                  | 13.6 | 0.14 |                       |      |
| ANC ( x10 <sup>6</sup> /L)      |                                |      |      |                       |      |                       |      |      |                       |      |
| < 1000                          | 30/52                          | 57.7 |      |                       |      | 2/52                  | 3.8  |      |                       |      |
| ≥ 1000                          | 20/46                          | 43.5 | 0.22 |                       |      | 6/46                  | 13.0 | 0.14 |                       |      |
| Hemoglobin (g/dL)               |                                |      |      |                       |      |                       |      |      |                       |      |
| < 10                            | 44/80                          | 55.0 |      |                       |      | 7/80                  | 8.8  |      |                       |      |
| ≥ 10                            | 6/18                           | 33.3 | 0.12 |                       |      | 1/18                  | 5.6  | 1.0  |                       |      |
| Platelets (x10 <sup>9</sup> /L) |                                |      |      |                       |      |                       |      |      |                       |      |
| < 100                           | 35/73                          | 47.9 |      |                       |      | 7/73                  | 9.6  |      |                       |      |
| ≥ 100                           | 15/25                          | 60.0 | 0.36 |                       |      | 1/25                  | 4.0  | 0.46 |                       |      |
| PB blast                        |                                |      |      |                       |      |                       |      |      |                       |      |
| No                              | 43/73                          | 58.9 |      | 1                     |      | 4/74                  | 5.4  |      | 1                     |      |
| Yes                             | 7/25                           | 28.0 | 0.01 | 0.33 (0.12–0.93)      | 0.04 | 4/24                  | 16.7 | 0.1  | 3.36 (0.64–17.80)     | 0.15 |

BM blast

|       |       |      |      |      |          |
|-------|-------|------|------|------|----------|
| < 15% | 32/57 | 56.1 |      | 4/57 | 7.0      |
| ≥ 15% | 18/41 | 43.9 | 0.31 | 4/41 | 9.8 0.72 |

HMT, hypomethylating treatment; OR, odds ratio; CI, confidence interval; MDS, myelodysplastic syndrome; WHO, World Health Organization; RAEB-1, refractory anemia of excess blast -1; RAEB-2, refractory anemia of excess blast -2; CMMoL -1/2, chronic myelomonocytic leukemia -1 & -2; IPSS, International Prognostic Scoring System; WBC, white blood cell; ANC, absolute neutrophil count; PB, peripheral blast; BM, bone marrow

**Supplementary Figure 1**

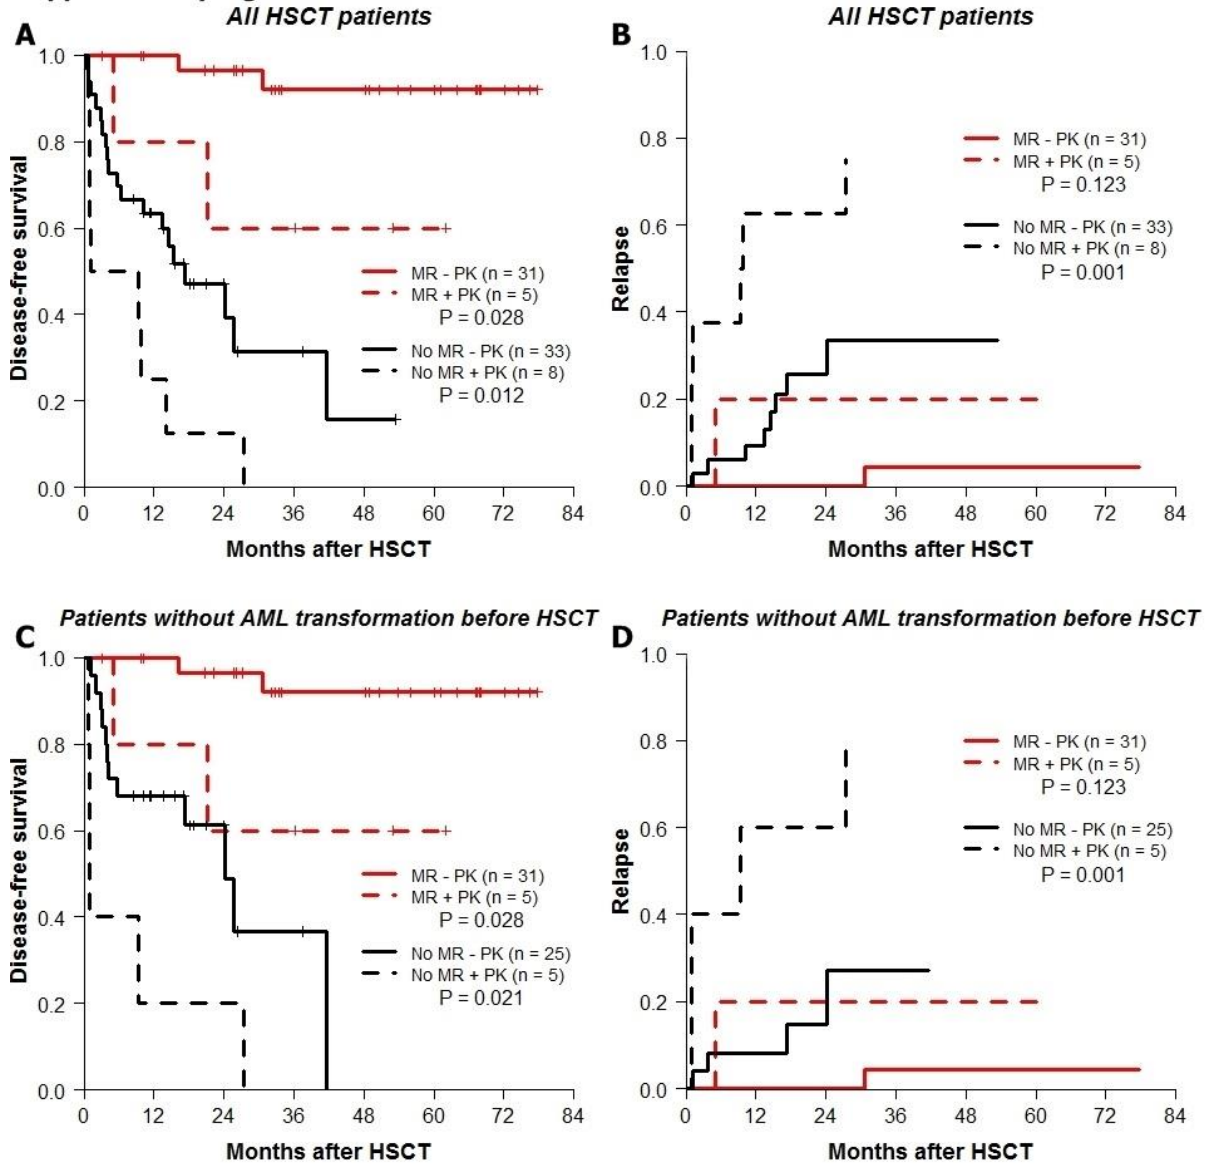

**Supplementary Figure 1. Posttransplantation outcome according to combined risk groups of marrow response (MR) and poor karyotype (PK).** Probability of (A) DFS and (B) cumulative incidence of relapse in all HSCT patients (n = 77); probability of (C) DFS and (D) cumulative incidence of relapse in 66 HSCT patients who did not experience AML transformation before HSCT.

**Supplementary Figure 2**  
*All 98 patients*

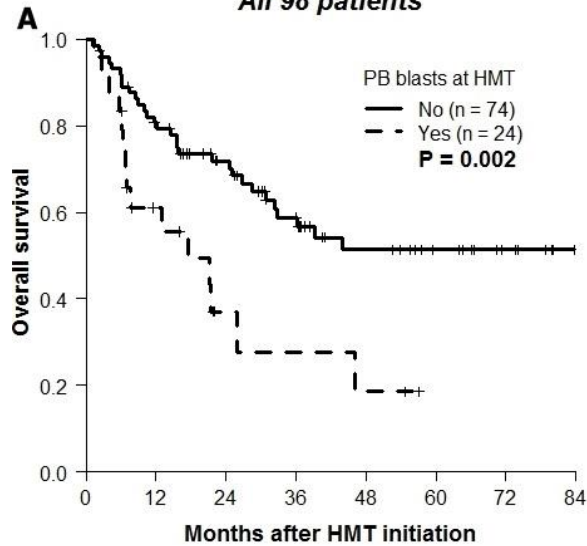

*Transplanted 77 patients*

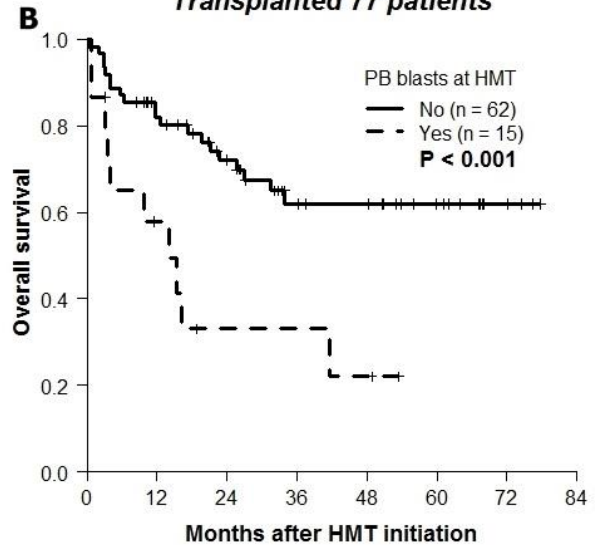

**Supplementary Figure 2. Kaplan-Meier analyses for survival from HMT according to the presence of PB blasts at HMT.** The influences of PB blasts on HMT response and leukemic transformation were further translated into significant differences in 4-year OS from HMT according to the presence of PB blasts among (A) all higher-risk MDS patients who received HMT (n = 98; 20.5% ± 11.0% vs. 52.0% ± 6.9%) and among (B) those who received HSCT following HMT (n = 77; 22.0% ± 12.6% vs. 61.7% ± 7.1%).
